# Supplementary material for: Adolescent Intermittent Ethanol Drives Modest Neuroinflammation but Does Not Escalate Drinking in Male Rats
Source: MDPI journal article supplement (doi:10.3390/cells12212572), 2023-11-04
Supplement: s1 [file s1]

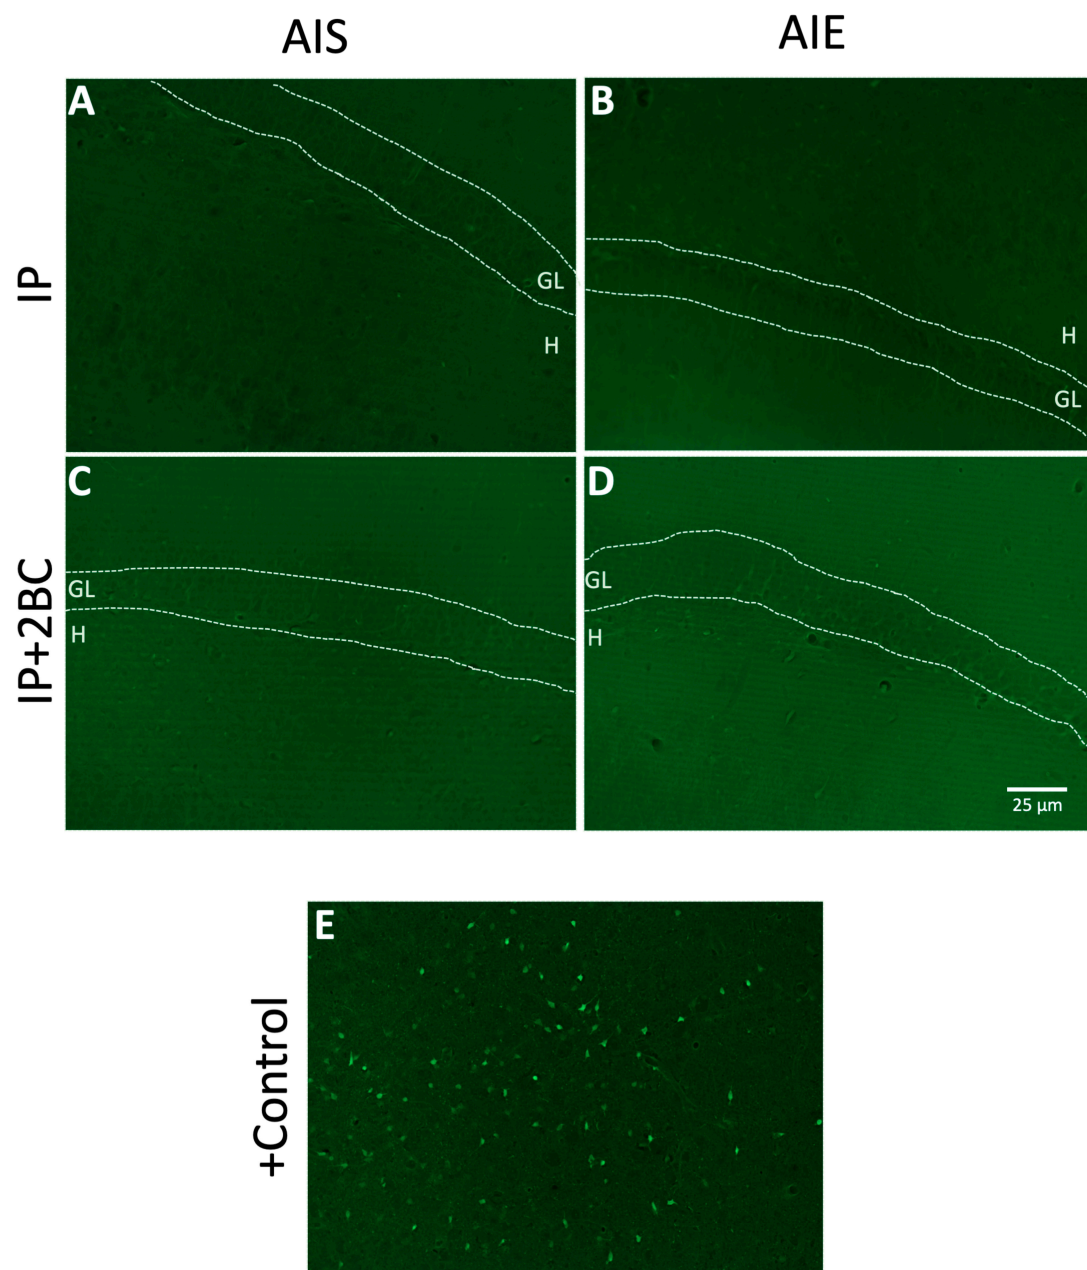

**Figure S1.** FluoroJade B (FJB). No FJB+ staining was found in the hippocampus of any rat (A-D). Positive control tissue subjected to TBI (E).
